# Supplementary material
Source: MDPI journal article supplement (https://www.mdpi.com/2673-8015/4/1/10)
Supplement: s1 [file s1]

## Supplementary material

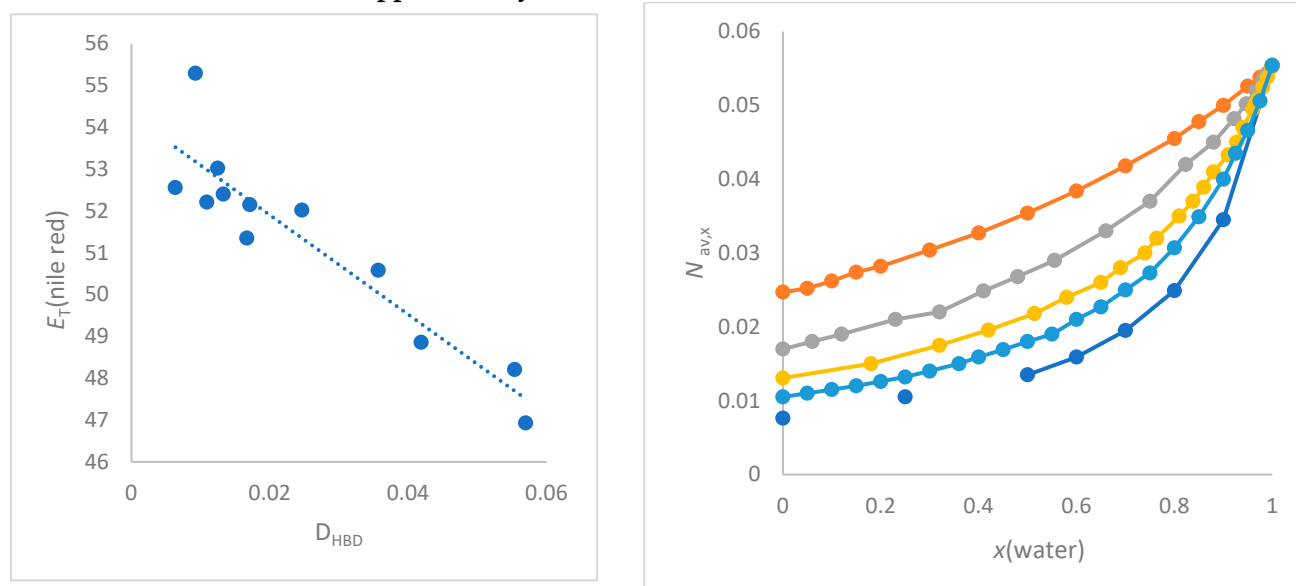

(a)

(b)

Figure S1a (left panel) Correlation of  $E_T(\text{nile red})$  (kcal/mol) as a function of  $D_{\text{HBD}}$  (mol/cm<sup>3</sup>) for protic solvents including water, methanol, ethanol, 1-propanol, 2-propanol, 1-butanol, 2-methyl-2-propanol, ethanolamine, 1,2-ethanediols, 2,2,2-trifluoroethanol and 1,1,1,3,3,3-hexafluoro-2-propanol. The UV/vis-spectroscopic data are taken from ref. [72] and the  $D_{\text{HBD}}$  parameter from [62].  $E_T(\text{nile red}) = -118.8 D_{\text{HBD}} + 54.3$ ,  $n = 12$ ,  $r = 0.924$ . The correlation supports the  $D_{\text{HBD}}$  parameter for 2,2,2-trifluoroethanol and 1,1,1,3,3,3-hexafluoro-2-propanol from ref. [62].

FigS1b. (right panel) Plots of  $N_{\text{av},x}$  (sum of total OH dipoles) (in mol/cm<sup>3</sup>) as a function of  $x(\text{water})$  for methanol/water (red dots), ethanol/water (grey dots) 2-propanol/water (yellow dots), 2-methyl-2-propanol/water (light blue dots); 2-n-butoxyethanol/water (deep blue) mixtures, physical data from references [191, 198-202].

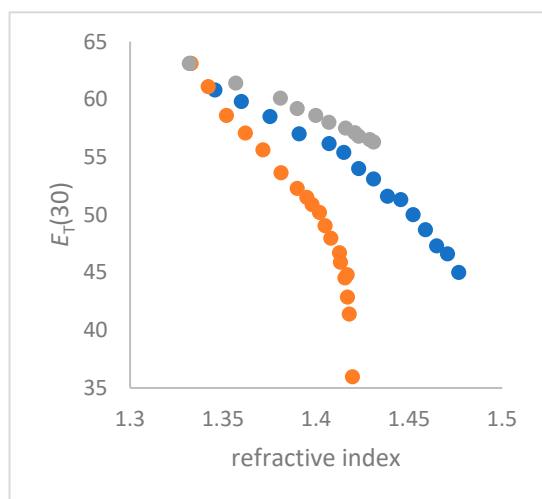

Figure. S2 Plots of  $E_T(30)$  (kcal/mol) as a function of  $n_D^{20}$  for 1,2-ethanediol/water (grey), DMSO/water (blue) and 1,4-dioxane/water (red) mixtures.

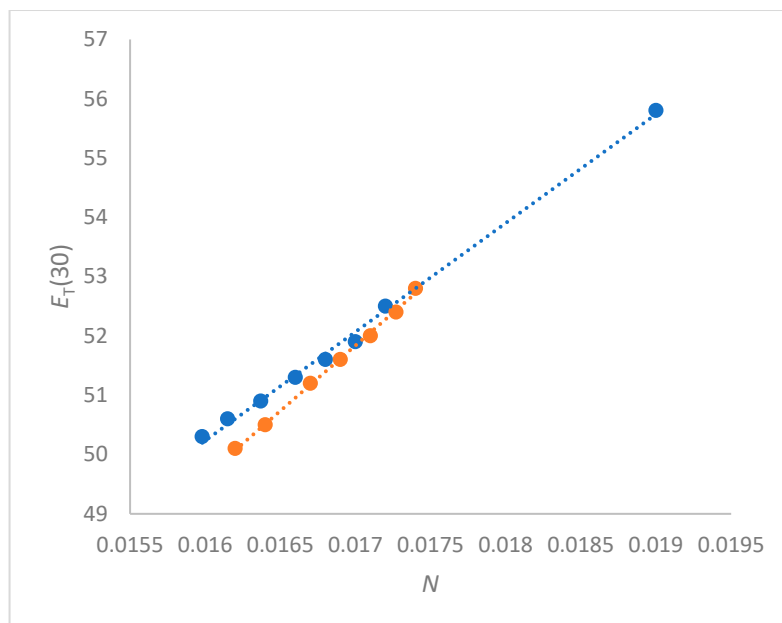

Figure S3. Correlation of  $E_T(30)$  (in kcal/mol) as a function of  $N$  (in mol/cm<sup>3</sup>) in the temperature range from -75 to +75 °C, Reichardt [1] (blue dots) and Linert [116] (red dots). Densities see ref. [218].

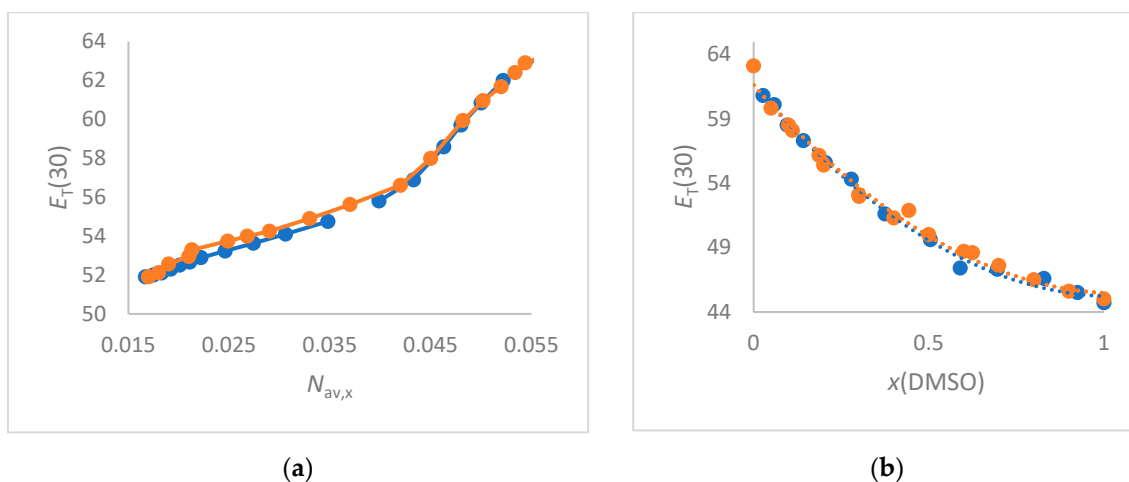

Figure S4a (left panel). Comparison of  $E_T(30)$  (kcal/mol) as a function of  $N_{av,x}$  (mol/cm<sup>3</sup>) for ethanol/water mixtures. Data from Dimroth/Reichardt [2] (red dots) and data from Rosés [18] (blue dots), (25°C); Figure S4b (right panel). Comparison of  $E_T(30)$  (kcal/mol) as a function of  $x(\text{DMSO})$  for DMSO/water mixtures data from [12,14, 121, 122] (red dots) (25°C) and data from Connors [15] (blue dots).

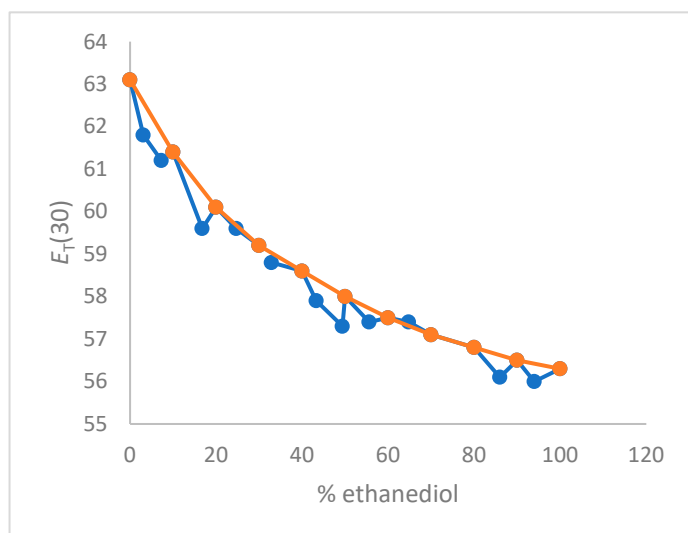

Figure S5. Comparison of  $E_T(30)$  (kcal/mol) as a function of  $x(1,2\text{-ethanediol})$  (in mol %) for 1,2-ethanediol/water mixtures, data from Kosower/Marcus [12] (red dots) (25 °C) ; data from Connors [15] (blue dots).

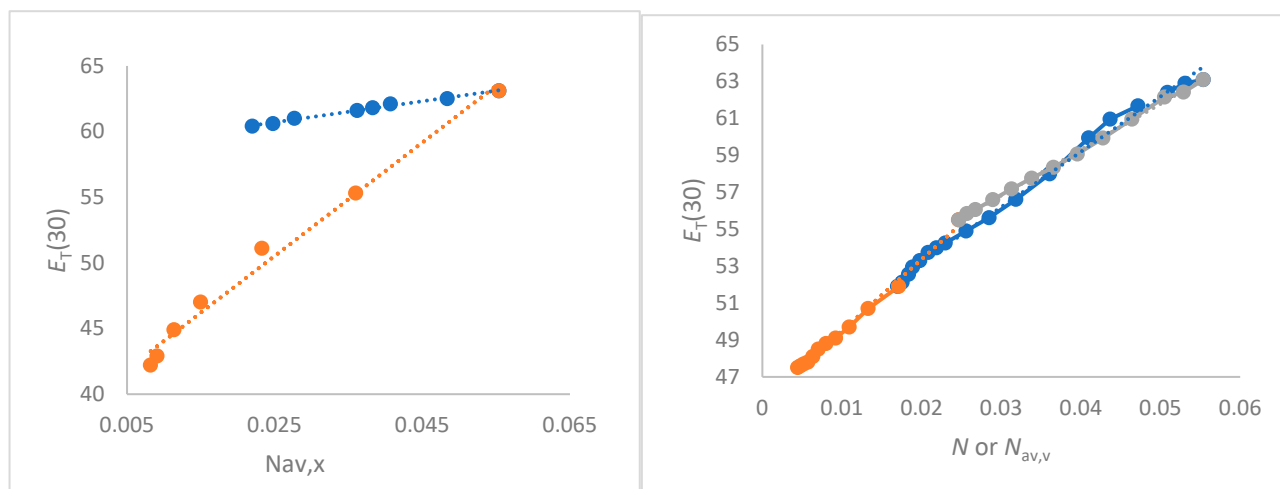

Figure S6a.(left panel)  $E_T(30)$  (kcal/mol) as a function of  $N_{av,x}$  (mol/cm<sup>3</sup>) for urea/water (blue) and  $N,N'$ -dimethylpropyleneurea/water (red) mixtures; data from [143, 144].  $E_T(30)$  (urea/water) =  $80.3 + 58.7$ ;  $n = 8$ ,  $r = 0.996$ ;  $E_T(30)$   $N,N'$ -dimethylpropyleneurea /water) =  $432 + 39.7$ ;  $n = 7$ ,  $r = 0.994$ ; Figure S6b (right panel). Overall correlation of  $E_T(30)$  (kcal/mol) as a function of  $N$  for the homologous series of primary alcohols (red dots) as well as  $E_T(30)$  as function of  $N_{av,v}$  (mol/cm<sup>3</sup>) for ethanol/water mixtures (blue dots) and methanol/water mixtures (grey dots). All  $E_T(30)$  data are taken from [2,18] and [34].

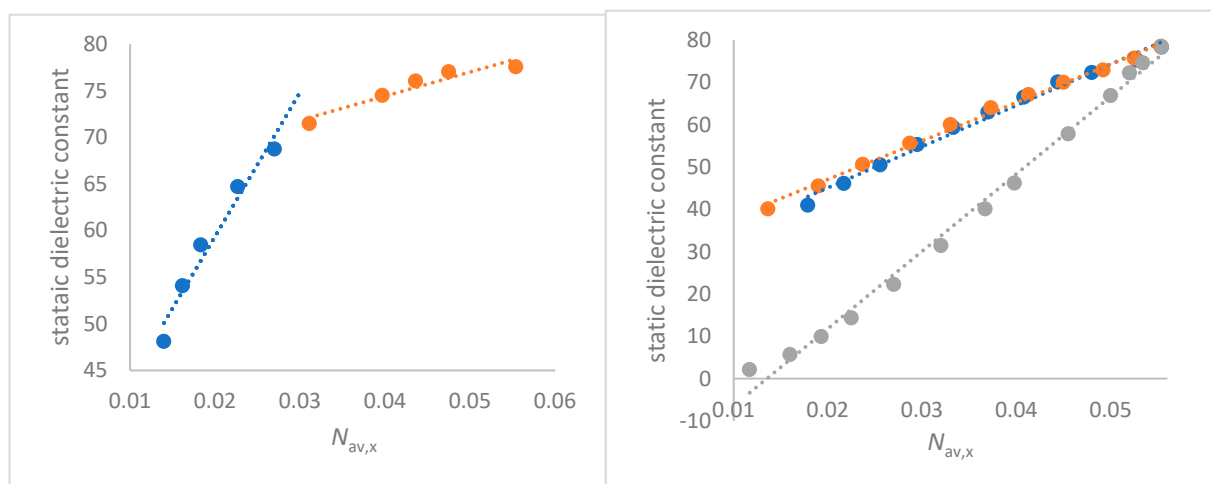

Figure S7a.(left panel) Correlation of the static dielectric constant of DMSO /water mixtures [151] as a function of  $N_{av,x}$  (mol/cm<sup>3</sup>); Figure S7b (right panel). Correlation of the static dielectric constant  $\epsilon_r$  as function of  $N_{av,x}$  (mol/cm<sup>3</sup>) for several co-solvent/water mixtures including the pure co-solvents, 1,4-dioxane/water mixtures [162]:  $\epsilon_r = 1827 N_{av,x} - 25$ ;  $n = 11$ ;  $r = 0.996$  (grey dots). The 1,2-ethanediol/water mixtures,  $\epsilon_r = 975 N_{av,x} + 25$ ;  $n = 11$ ;  $r = 0.994$  (blue dots) and the glycerol/water mixtures,  $\epsilon_r = 908 N_{av,x} - 29$ ;  $n = 11$ ;  $r = 0.999$  (red dots), are used as independent reference.

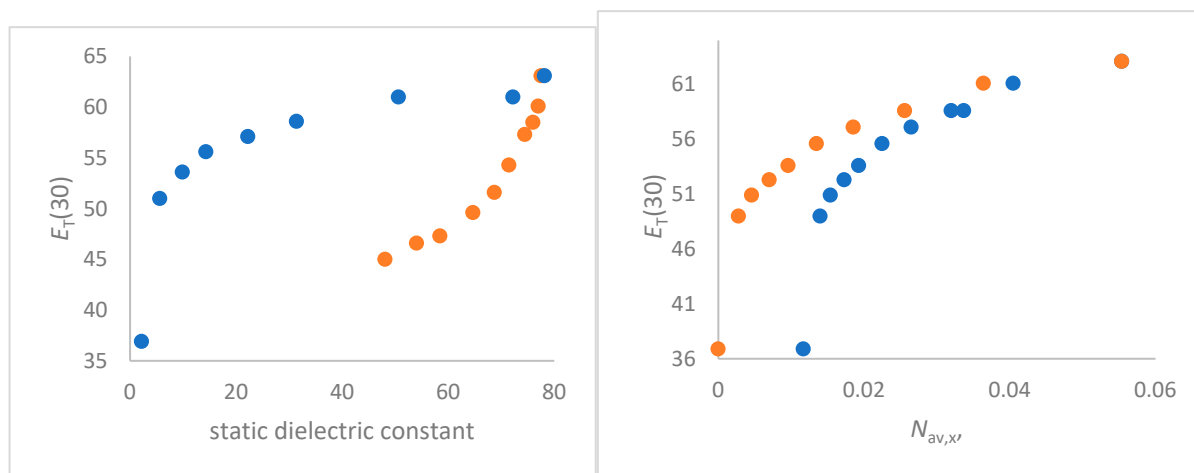

Figure S8a. (left panel) Correlation of  $E_T(30)$  (kcal/mol) as a function of the static dielectric constant  $\epsilon_r$  for DMSO/water (red) [151] and 1,4-dioxane/water mixtures [162] (blue). Fig. S8b. (right panel) Correlation of  $E_T(30)$  (kcal/mol) as a function of  $N_{av,x}$  (blue) and  $N_{av,x}(\text{water})$  (red) for 1,4-dioxane/water mixtures.

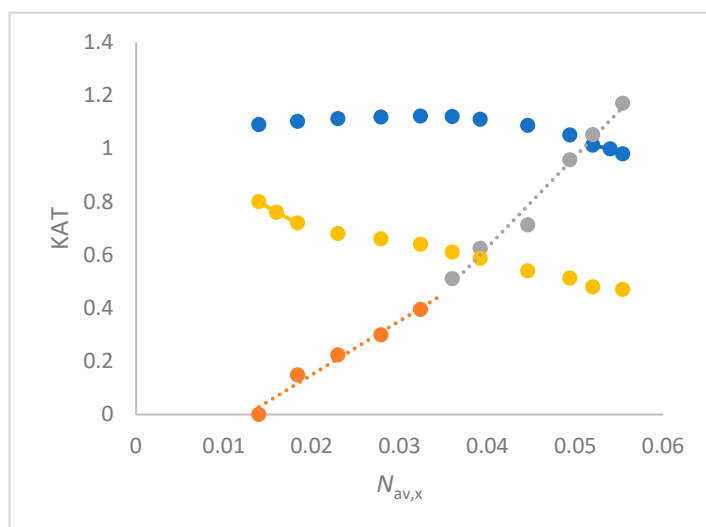

Figure S9 Plots of Kamlet-Taft (KAT)  $\alpha$  HBD parameter (red and grey dots),  $\beta$  (HBA) parameter (yellow dots) and  $\pi^*$  dipolarity/polarizability parameter (blue dots) as a function of  $N_{av,x}$  (mol/cm<sup>3</sup>) for DMSO/water mixtures [157]. Note the maximum KAT value for  $\pi^*$  corresponds exactly to the kink in the curve for KAT  $\alpha$  as a function of  $N_{av,x}$  and the inflection point of  $\beta$  versus  $N_{av,x}$  at the same composition.

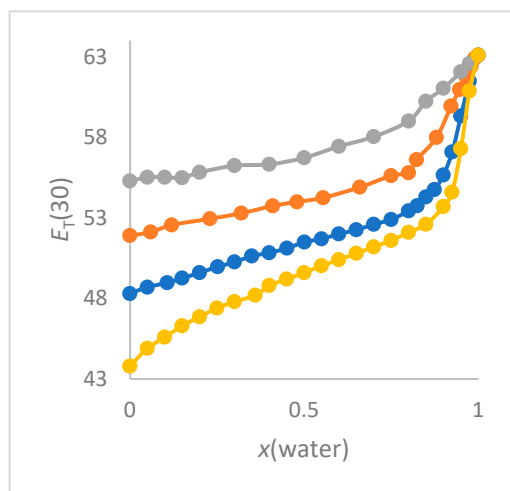

Figure S10. Correlations of  $E_T(30)$  as function of  $x(\text{water})$  for methanol/water (grey), ethanol/water (red), 2-propanol/water (blue), and 2-methyl-2-propanol/water (yellow) mixtures. Data from [2, 17-19].

| <b>Table S1</b> $E_T(30)$ values for ethanol measured at various temperatures; data from Reichardt and Linert [1, 116] and densities at various temperatures of the ethanol/water mixture [218]. |                           |                       |                       |
|--------------------------------------------------------------------------------------------------------------------------------------------------------------------------------------------------|---------------------------|-----------------------|-----------------------|
| T / °C                                                                                                                                                                                           | Density g/cm <sup>3</sup> | N mol/cm <sup>3</sup> | $E_T(30)$<br>kcal/mol |
| -75                                                                                                                                                                                              | 0.87                      | 0.019                 | 55.8                  |
| 15                                                                                                                                                                                               | 0.7936                    | 0.0172                | 52.5                  |
| 25                                                                                                                                                                                               | 0.785                     | 0.017                 | 51.9                  |
| 35                                                                                                                                                                                               | 0.7767                    | 0.0168                | 51.6                  |
| 45                                                                                                                                                                                               | 0.768                     | 0.0166                | 51.3                  |
| 55                                                                                                                                                                                               | 0.759                     | 0.01637               | 50.9                  |
| 65                                                                                                                                                                                               | 0.7512                    | 0.01615               | 50.6                  |
| 75                                                                                                                                                                                               | 0.7428                    | 0.01598               | 50.3                  |
| 3.9                                                                                                                                                                                              | 0.80309                   | 0.0174                | 52.8                  |
| 11.5                                                                                                                                                                                             | 0.7956                    | 0.01727               | 52.4                  |
| 20.2                                                                                                                                                                                             | 0.789                     | 0.0171                | 52                    |
| 29.5                                                                                                                                                                                             | 0.78138                   | 0.0169                | 51.6                  |
| 41.8                                                                                                                                                                                             | 0.7709                    | 0.0167                | 51.2                  |
| 58                                                                                                                                                                                               | 0.7572                    | 0.7572                | 50.5                  |
| 67.5                                                                                                                                                                                             | 0.749                     | 0.0162                | 50.1                  |

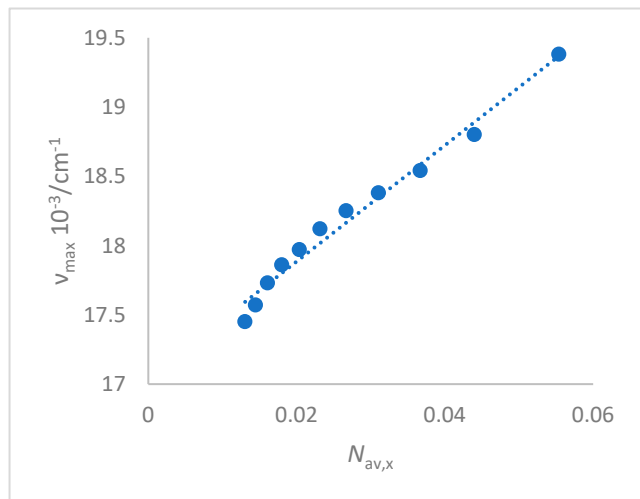

Figure S11. Plot of  $\nu_{\max}(\text{Fe})$  [ $10^3 \text{ cm}^{-1}$ ] as function of  $N_{\text{av},x}$  (mol/cm<sup>3</sup>) for the 2-propanol/water mixtures [126]. Linear fit:  $\nu_{\max}(\text{Fe})$  [ $10^3 \text{ cm}^{-1}$ ] =  $41.95 N_{\text{av},x} + 17.05$ ;  $r = 0.99$ ,  $n = 11$ .

| <b>Table S2.</b> Physical properties of the 1,2-ethanediol/water mixture in terms of mole fractions as well as refractive index and $E_T(30)$ values [12, 130]. $D_{\text{av},x,\text{HBD}}$ values are the total concentration of OH dipoles when the partial OH concentration of the 1,2-ethanediol component is taken into account according to Equation (9). |                              |            |                   |                                          |                                                   |                                                     |                       |
|------------------------------------------------------------------------------------------------------------------------------------------------------------------------------------------------------------------------------------------------------------------------------------------------------------------------------------------------------------------|------------------------------|------------|-------------------|------------------------------------------|---------------------------------------------------|-----------------------------------------------------|-----------------------|
| X(water)                                                                                                                                                                                                                                                                                                                                                         | Density<br>g/cm <sup>3</sup> | $n_D^{20}$ | $M_{\text{av},x}$ | $N_{\text{av},x}$<br>mol/cm <sup>3</sup> | $N_{\text{av},x\text{CH}}$<br>mol/cm <sup>3</sup> | $D_{\text{av},x,\text{HBD}}$<br>mol/cm <sup>3</sup> | $E_T(30)$<br>Kcal/mol |
| 1                                                                                                                                                                                                                                                                                                                                                                | 0.998                        | 1.332      | 18.015            | 0.0554                                   | 0                                                 | 0.0554                                              | 63.1                  |
| 0.9                                                                                                                                                                                                                                                                                                                                                              | 1.03293                      | 1.357      | 22.42             | 0.046                                    | 0.0184                                            | 0.0506                                              | 61.4                  |
| 0.8                                                                                                                                                                                                                                                                                                                                                              | 1.05685                      | 1.381      | 26.82             | 0.0394                                   | 0.0315                                            | 0.0473                                              | 60.1                  |

|     |         |       |       |         |        |        |      |
|-----|---------|-------|-------|---------|--------|--------|------|
| 0.7 | 1.0734  | 1.39  | 31.23 | 0.0344  | 0.0413 | 0.0447 | 59.2 |
| 0.6 | 1.0844  | 1.4   | 35.64 | 0.0304  | 0.0486 | 0.0425 | 58.6 |
| 0.5 | 1.0921  | 1.407 | 40.05 | 0.0273  | 0.0546 | 0.041  | 58   |
| 0.4 | 1.09744 | 1.416 | 44.45 | 0.0247  | 0.0593 | 0.039  | 57.5 |
| 0.3 | 1.102   | 1.421 | 48.84 | 0.0225  | 0.063  | 0.038  | 57.1 |
| 0.2 | 1.10518 | 1.423 | 53.26 | 0.02075 | 0.0664 | 0.037  | 56.8 |
| 0.1 | 1.1078  | 1.429 | 57.66 | 0.0192  | 0.069  | 0.0365 | 56.5 |
| 0   | 1.10986 | 1.431 | 62.07 | 0.01788 | 0.0715 | 0.0357 | 56.3 |

**Table S3.** Physical data of methanol/water mixtures with respect to mole, volume and mass fraction, and  $E_T(30)$  values [18]. Physical data from [215-217].

| X(water) | $M_{av,v} / M_{av,x}$ | Density<br>g/cm <sup>3</sup> | $M_{av,x}$<br>g/mol | $M_{av,v}$<br>g/mol | $N_{av,x}$<br>mol/cm <sup>3</sup> | $N_{av,v}$<br>mol/cm <sup>3</sup> | $N_{av,w}$<br>mol/cm <sup>3</sup> | $E_T(30)$<br>kcal/mol |
|----------|-----------------------|------------------------------|---------------------|---------------------|-----------------------------------|-----------------------------------|-----------------------------------|-----------------------|
| 1        | 1                     | 0.998                        | 18.015              | 18.015              | 0.0554                            | 0.0554                            | 0.0554                            | 63.1                  |
| 0.977    | 1.018                 | 0.988                        | 18.34               | 18.67               | 0.0538                            | 0.0529                            | 0.0532                            | 62.42                 |
| 0.958    | 1.052                 | 0.98475                      | 18.56               | 19.54               | 0.053                             | 0.05054                           | 0.0516                            | 62.15                 |
| 0.845    | 1.055                 | 0.971                        | 19.83               | 20.92               | 0.049                             | 0.04643                           | 0.0476                            | 60.96                 |
| 0.84     | 1.108                 | 0.960                        | 20.24               | 22.43               | 0.047                             | 0.0428                            | 0.0449                            | 59.93                 |
| 0.77     | 1.122                 | 0.945                        | 21.27               | 23.88               | 0.044                             | 0.03957                           | 0.04148                           | 59.07                 |
| 0.69     | 1.13                  | 0.927                        | 22.3                | 25.34               | 0.0415                            | 0.03658                           | 0.038                             | 58.35                 |
| 0.6      | 1.138                 | 0.91                         | 23.62               | 26.88               | 0.0385                            | 0.03385                           | 0.036                             | 57.76                 |
| 0.49     | 1.123                 | 0.885                        | 25.16               | 28.256              | 0.035                             | 0.03132                           | 0.0328                            | 57.18                 |
| 0.36     | 1.096                 | 0.85688                      | 26.97               | 29.57               | 0.0318                            | 0.02897                           | 0.03                              | 56.6                  |
| 0.198    | 1.054                 | 0.8259                       | 29.27               | 30.85               | 0.0282                            | 0.02677                           | 0.0272                            | 56.06                 |
| 0.106    | 1.031                 | 0.81                         | 30.54               | 31.49               | 0.0265                            | 0.02572                           | 0.026                             | 55.84                 |
| 0        | 1                     | 0.791                        | 32.04               | 32.04               | 0.0247                            | 0.02471                           | 0.02471                           | 55.5                  |

**Table S4.**  $E_T(30)$  and  $E_T(1)$  values, density, average molar masses, average molar concentrations in ethanol/water mixtures. Data from Reichardt [1,2]. Physical solvent mixture are data from [215-217].

| X(water) | density | $M_{av,x}$<br>g/mol | $N_{av,x}$<br>mol/cm <sup>3</sup> | $M_{av,w}$<br>g/mol | $M_{av,w} / M_{av,x}$ | $N_{av,w}$<br>mol/cm <sup>3</sup> | $M_{av,w}$<br>g/mol | $E_T(30)$<br>Kcal/mol | $E_T(1)$<br>Kcal/mol |
|----------|---------|---------------------|-----------------------------------|---------------------|-----------------------|-----------------------------------|---------------------|-----------------------|----------------------|
| 1        | 0.9982  | 18.015              | 0.0554                            | 18.015              | 1                     | 0.0554                            | 18.015              | 63.1                  | 69.1                 |
| 0.99     | 0.9945  | 18.29               | 0.0544                            | 18.57               | 1.015                 | 0.0535                            | 18.71               | 62.9                  |                      |
| 0.98     | 0.99106 | 18.57               | 0.0533                            | 19.13               | 1.03                  | 0.0518                            | 19.414              | 62.4                  |                      |
| 0.967    | 0.98476 | 18.94               | 0.052                             | 20.26               | 1.07                  | 0.0486                            | 20.8                | 61.68                 | 68.6                 |
| 0.947    | 0.97897 | 19.5                | 0.0519                            | 21.38               | 1.096                 | 0.0458                            | 22.2                | 60.96                 |                      |
| 0.922    | 0.9736  | 20.2                | 0.0464                            | 22.5                | 1.114                 | 0.0433                            | 23.6                | 59.94                 | 67.4                 |
| 0.88     | 0.9622  | 21.4                | 0.045                             | 24.89               | 1.163                 | 0.0386                            | 26.43               | 57.99                 | 66.2                 |
| 0.823    | 0.9485  | 22.5                | 0.042                             | 27.27               | 1.212                 | 0.0348                            | 29.34               | 56.61                 | 64.8                 |
| 0.8      | 0.9415  | 23.6                | 0.0399                            | 28.96               | 1.227                 |                                   |                     | 55.8                  |                      |
| 0.75     | 0.93017 | 25.03               | 0.0372                            | 29.9                | 1.194                 | 0.0311                            | 32.035              | 55.62                 | 64.0                 |
| 0.66     | 0.90916 | 27.55               | 0.033                             | 32.59               | 1.183                 | 0.0279                            | 34.84               | 54.9                  | 63.5                 |
| 0.555    | 0.8856  | 30.5                | 0.029                             | 35.185              | 1.15                  | 0.0252                            | 37.65               | 54.25                 | 63                   |
| 0.48     | 0.8728  | 32.6                | 0.0267                            | 37.035              | 1.136                 | 0.0236                            | 39.05               | 53.99                 |                      |
| 0.41     | 0.8593  | 34.56               | 0.0247                            | 38.55               | 1.115                 | 0.0223                            | 40.46               | 53.74                 | 62.6                 |
| 0.32     | 0.8449  | 37.08               | 0.0228                            | 40.41               | 1.09                  | 0.0209                            | 41.86               | 53.29                 |                      |
| 0.23     | 0.8293  | 39.61               | 0.0209                            | 42.086              | 1.0625                | 0.0197                            | 43.28               | 52.95                 | 61.9                 |
| 0.12     | 0.81145 | 42.7                | 0.019                             | 43.96               | 1.03                  | 0.0185                            | 44.66               | 52.56                 |                      |
| 0.06     | 0.80165 | 44.38               |                                   | 44.95               | 1.013                 | 0.0178                            | 45.33               | 52.12                 |                      |
| 0        | 0.7893  | 46.07               | 0.017                             | 46.07               | 1                     | 0.017                             | 46.07               | 51.9                  | 61.2                 |

**Table S5.** Physical properties and  $E_T(30)$  values of the formamide/water mixtures [21, 120, 137, 138].

| X(water) | Density<br>g/ml | $M_{av,x}$<br>g/mol | $N_{av,x}$<br>mol/cm <sup>3</sup> | $E_T(30)$<br>kcal/mol |
|----------|-----------------|---------------------|-----------------------------------|-----------------------|
| 0        | 1.1273          | 45.04               | 0.025                             | 55.8                  |
| 0.02     | 1.1261          | 44.49               | 0.0253                            | 55.9                  |
| 0.04     | 1.1235          | 43.96               | 0.0255                            | 56                    |
| 0.1      | 1.1152          | 42.33               | 0.026                             | 56.3                  |
| 0.102    | 1.115           | 42.28               | 0.02637                           | 56.3                  |
| 0.1083   | 1.1049          | 49.62               | 0.02756                           | 56.6                  |
| 0.3      | 1.0923          | 37.48               | 0.029                             | 57                    |
| 0.35     | 1.0832          | 35.58               | 0.0304                            | 57.3                  |
| 0.36     | 1.0819          | 35.3                | 0.0306                            | 57.3                  |
| 0.4      | 1.076           | 34.23               | 0.0314                            | 57.4                  |
| 0.422    | 1.074           | 33.63               | 0.0319                            | 57.6                  |
| 0.488    | 1.065           | 31.85               | 0.033                             | 57.9                  |
| 0.516    | 1.0612          | 31.15               | 0.0341                            | 58.0                  |
| 0.528    | 1.06            | 30.76               | 0.0345                            | 58.2                  |
| 0.56     | 1.0559          | 29.9                | 0.0353                            | 58.2                  |
| 0.6      | 1.0509          | 28.82               | 0.036                             | 58.5                  |
| 0.613    | 1.049           | 28.47               | 0.0368                            | 58.4                  |
| 0.638    | 1.0457          | 27.77               | 0.0376                            | 58.6                  |
| 0.7      | 1.0379          | 26.12               | 0.0397                            | 59.3                  |
| 0.8      | 1.025           | 23.42               | 0.0437                            | 60.2                  |
| 0.9      | 1.012           | 20.24               | 0.05                              | 61.4                  |
| 1        | 0.998           | 18.015              | 0.0554                            | 63.1                  |

**Table S6.** The *N*-methylformamide (NMF) /water mixtures. X(water),  $M_{av,x}$ ,  $N_{av,x}$ . Data from [139, 219].  $E_T(30)$  data from [21].

| X(water) | $M_{av,x}$ | Density<br>g/cm <sup>3</sup> | $N_{av,x}$<br>mol/cm <sup>3</sup> | $E_T(30)$<br>kcal/mol |
|----------|------------|------------------------------|-----------------------------------|-----------------------|
| 1        | 18.015     | 0.997                        | 0.0554                            | 63.1                  |
| 0.91     | 21.7       | 1.009                        | 0.0465                            | 60.1                  |
| 0.89     | 22.53      | 1.0103                       | 0.0448                            | 59,6                  |
| 0.83     | 24.99      | 1.013                        | 0.0405                            | 58,8                  |
| 0.78     | 27.05      | 1.015                        | 0.0375                            | 58,2                  |
| 0.71     | 29.92      | 1.01657                      | 0.034                             | 57,4                  |
| 0.66     | 31.99      | 1.01625                      | 0.0317                            | 57,2                  |
| 0.62     | 33.6       | 1.015                        | 0.0302                            | 56,9                  |
| 0.55     | 36.51      | 1.014                        | 0.0278                            | 56,45                 |
| 0.32     | 45.9       | 1.007                        | 0.022                             | 55,4                  |
| 0.3      | 46.75      | 1.006                        | 0.0215                            | 55,2                  |
| 0.16     | 52.5       | 1.002                        | 0.0191                            | 54,6                  |
| 0.13     | 53.72      | 1.002                        | 0.0186                            | 54,5                  |
| 0.07     | 56.19      | 1.00072                      | 0.0178                            | 54,3                  |
| 0        | 59.067     | 0.99929                      | 0.017                             | 54,1                  |

**Table S7.** The dimethylformamide (DMF)/water mixtures, physical data and  $E_T(30)$  values [21, 141, 142, 220].

| X(water) | Density<br>g/cm <sup>3</sup> | $M_{av,x}$<br>g/mol | $N_{av,x}$<br>mol/cm <sup>3</sup> | $E_T(30)$<br>kcal/mol |
|----------|------------------------------|---------------------|-----------------------------------|-----------------------|
| 1        | 0.998                        | 18.015              | 0.0554                            | 63.1                  |

|       |        |        |         |       |
|-------|--------|--------|---------|-------|
| 0.96  |        |        |         | 60.2  |
| 0.945 | 0.9955 | 21.13  | 0.0469  | 59.9  |
| 0.93  | 0.996  | 21.32  | 0.0467  | 59.2  |
| 0.92  | 0.997  | 22.421 | 0.0448  | 58.5  |
| 0.91  | 0.997  | 22.97  | 0.0434  | 58.2  |
| 0.85  | 0.9968 | 26.27  | 0.0379  | 56.2  |
| 0.75  | 0.9937 | 31.78  | 0.03126 | 54    |
| 0.65  | 0.964  | 37.3   | 0.0258  | 51.9  |
| 0.55  | 0.9799 | 42.78  | 0.0229  | 50.05 |
| 0.45  | 0.971  | 48.29  | 0.02    | 49.3  |
| 0.355 | 0.964  | 53.5   | 0.018   | 48    |
| 0.25  | 0.9578 | 59.3   | 0.0162  | 46.8  |
| 0.214 | 0.956  | 61.34  | 0.0156  | 46.4  |
| 0.17  | 0.9533 | 63.8   | 0.0149  | 45.8  |
| 0.12  | 0.95   | 66.48  | 0.0143  | 45.2  |
| 0.06  | 0.947  | 69.6   | 0.0136  | 44.4  |
| 0.055 | 0.9462 | 70.07  | 0.0135  | 44.0  |
| 0     | 0.943  | 73.09  | 0.0129  | 43.7  |

| <b>Table S8.</b> The <i>N</i> -formylmorpholine /water mixtures, $N_{av,x}$ , refractive index and $E_T(30)$ values [32, 221, 222]. |                              |                    |                                   |                                     |            |                       |
|-------------------------------------------------------------------------------------------------------------------------------------|------------------------------|--------------------|-----------------------------------|-------------------------------------|------------|-----------------------|
| X(water)                                                                                                                            | Density<br>g/cm <sup>3</sup> | $M_{avx}$<br>g/mol | $N_{av,x}$<br>mol/cm <sup>3</sup> | $N_{av,xCH}$<br>mol/cm <sup>3</sup> | $n_D^{20}$ | $E_T(30)$<br>Kcal/mol |
| 0                                                                                                                                   | 1.146                        | 115.13             | 0.0099                            | 0.0891                              | 1.4898     | 44.63                 |
| 0.05                                                                                                                                | 1.145                        | 110.3              | 0.0104                            |                                     |            | 45.12                 |
| 0.15                                                                                                                                | 1.144                        | 100.56             | 0.01137                           | 0.087                               | 1.4878     | 46.14                 |
| 0.2                                                                                                                                 | 1.143                        | 95.7               | 0.012                             | 0.0864                              | 1.485      | 46.66                 |
| 0.25                                                                                                                                | 1.142                        | 90.85              | 0.0125                            |                                     |            | 47.2                  |
| 0.3                                                                                                                                 | 1.14                         | 86                 | 0.01325                           | 0.08347                             | 1.481      | 47.47                 |
| 0.35                                                                                                                                | 1.139                        | 81.13              | 0.014                             |                                     |            | 48.3                  |
| 0.4                                                                                                                                 | 1.138                        | 76.3               | 0.0157                            | 0.08478                             | 1.475      | 48.82                 |
| 0.45                                                                                                                                | 1.1365                       | 71.4               | 0.0159                            |                                     |            | 49.36                 |
| 0.5                                                                                                                                 | 1.135                        | 66.57              | 0.017                             | 0.0765                              | 1.470      | 49.93                 |
| 0.55                                                                                                                                | 1.1325                       | 61.7               | 0.01835                           |                                     |            | 50.61                 |
| 0.6                                                                                                                                 | 1.13                         | 56.85              | 0.02                              |                                     |            | 51.29                 |
| 0.65                                                                                                                                | 1.125                        | 51.99              | 0.02164                           | 0.068                               | 1.458      | 51.93                 |
| 0.7                                                                                                                                 | 1.122                        | 47.14              | 0.0238                            | 0.06426                             | 1.448      | 52.82                 |
| 0.75                                                                                                                                | 1.115                        | 42.28              | 0.0264                            |                                     |            | 53.58                 |
| 0.8                                                                                                                                 | 1.1                          | 37.43              | 0.0294                            | 0.053                               | 1.433      | 54.71                 |
| 0.85                                                                                                                                | 1.088                        | 32.57              | 0.0334                            |                                     |            | 55.82                 |
| 0.9                                                                                                                                 | 1.06                         | 27.7               | 0.0382                            | 0.03438                             | 1.396      | 57.25                 |
| 0.95                                                                                                                                | 1.043                        | 22.86              | 0.0456                            |                                     |            | 59.9                  |
| 1                                                                                                                                   | 0.997                        | 18.015             | 0.05541                           | 0                                   | 1.335      | 63.1                  |

| <b>Table S9.</b> Physical properties and $E_T(30)$ values of DMSO/water mixtures from different literature sources [12,15], Density from [146, 148]. |                              |                     |                                |                       |
|------------------------------------------------------------------------------------------------------------------------------------------------------|------------------------------|---------------------|--------------------------------|-----------------------|
| X(water)                                                                                                                                             | Density<br>g/cm <sup>3</sup> | $M_{av,x}$<br>g/mol | $N_{av,x}$ mol/cm <sup>3</sup> | $E_T(30)$<br>kcal/mol |
| 1                                                                                                                                                    | 0,997                        | 18,015              | 0,0554                         | 63,1                  |
| 0,973                                                                                                                                                | 1,0116                       | 19,64               | 0,0515                         | 60,8                  |
| 0,9451                                                                                                                                               | 1,02145                      | 21,3                | 0,0479                         | 59,8                  |
| 0,941                                                                                                                                                | 1,0242                       | 21,56               | 0,0475                         | 60,1                  |



|        |         |       |         |       |
|--------|---------|-------|---------|-------|
| 0,904  | 1,0387  | 23,79 | 0,0436  | 58,5  |
| 0,9    | 1,04209 | 24,03 | 0,043   | 58,5  |
| 0,8895 | 1,045   | 24,66 | 0,0423  | 58,1  |
| 0,858  | 1,055   | 26,55 | 0,0397  | 57,3  |
| 0,8129 | 1,06865 | 29,26 | 0,0365  | 56,16 |
| 0,8    | 1,07163 | 30,04 | 0,0357  | 55,4  |
| 0,721  | 1,0837  | 34,8  | 0,0311  | 54,3  |
| 0,6984 | 1,088   | 36,14 | 0,03    | 52,96 |
| 0,7    | 1,085   | 36,05 | 0,03    | 53,1  |
| 0,625  | 1,094   | 40,56 | 0,027   | 51,6  |
| 0,6    | 1,09515 | 42,06 | 0,026   | 51,3  |
| 0,5569 | 1,097   | 44,65 | 0,0245  | 51,9  |
| 0,5    | 1,09794 | 48,07 | 0,0228  | 50    |
| 0,495  | 1,098   | 48,38 | 0,0227  | 49,6  |
| 0,41   | 1,0989  | 53,48 | 0,0205  | 47,4  |
| 0,4    | 1,0989  | 54,1  | 0,0203  | 48,7  |
| 0,375  | 1,0989  | 55,58 | 0,0197  | 48,6  |
| 0,305  | 1,0986  | 59,86 | 0,01835 | 47,3  |
| 0,3    | 1,09844 | 60,1  | 0,0183  | 47,6  |
| 0,2    | 1,0967  | 66,1  | 0,0166  | 46,5  |
| 0,171  | 1,0966  | 67,85 | 0,0162  | 46,6  |
| 0,1    | 1,0965  | 72    | 0,0152  | 45,6  |
| 0,075  | 1,096   | 73,63 | 0,0149  | 45,5  |
| 0      | 1,09528 | 78,13 | 0,014   | 45    |

**Table S10.** Physical properties of the 1,4-dioxane/water mixtures in terms of mole and volume fractions as well as refractive index and  $E_T(30)$  values, data from [2, 159-162, 165].

| X(water) | Density<br>g/cm <sup>3</sup> | $n_D^{20}$ | $M_{av,x}$<br>g/mol | $N_{av,x}$<br>mol/cm <sup>3</sup> | $M_{av,v}$<br>g/mol | $N_{av,v}$<br>mol/cm <sup>3</sup> | $E_T(30)$<br>kcal/mol |
|----------|------------------------------|------------|---------------------|-----------------------------------|---------------------|-----------------------------------|-----------------------|
| 1        | 0.9971                       | 1.333      | 18.015              | 0.0554                            | 18.015              | 0.0554                            | 63.1                  |
| 0.985    | 1.004                        |            | 19.06               | 0.0527                            |                     |                                   | 61.9                  |
| 0.977    | 1.0068                       | 1.3422     | 19.63               | 0.0513                            | 25.02               | 0.0402                            | 61.09                 |
| 0.971    | 1.0095                       |            | 20.04               | 0.0504                            |                     |                                   | 60.5                  |
| 0.95     | 1.0158                       | 1.352      | 21.52               | 0.0472                            | 32.03               | 0.0317                            | 58.6                  |
| 0.943    | 1.018                        |            | 22.01               | 0.0463                            |                     |                                   | 58.4                  |
| 0.917    | 1.023                        | 1.3621     | 23.83               | 0.0429                            | 39.03               | 0.0262                            | 57.07                 |
| 0.913    | 1.0235                       |            | 24.11               | 0.0424                            |                     |                                   | 57                    |
| 0.877    | 1.0285                       | 1.3716     | 26.63               | 0.0386                            | 46.05               | 0.0223                            | 55.62                 |
| 0.857    | 1.031                        |            | 28.04               | 0.0367                            |                     |                                   | 54.8                  |
| 0.826    | 1.034                        | 1.3813     | 30.21               | 0.034                             | 53.06               | 0.0189                            | 53.64                 |
| 0.759    | 1.0365                       | 1.39       | 34.9                | 0.0297                            | 60.08               | 0.0173                            | 52.27                 |
| 0.74     | 1.0367                       |            | 36.24               | 0.0286                            |                     |                                   | 52.1                  |
| 0.718    | 1.037                        | 1.3952     | 37.78               | 0.0274                            | 63.57               | 0.0163                            | 51.5                  |
| 0.67     | 1.0372                       | 1.398      | 41.14               | 0.0252                            | 67.08               | 0.0155                            | 50.87                 |
| 0.612    | 1.0366                       | 1.402      | 44.58               | 0.0232                            | 70.58               | 0.0147                            | 50.2                  |
| 0.542    | 1.035                        | 1.405      | 49.98               | 0.0207                            | 74.09               | 0.014                             | 49.04                 |
| 0.515    | 1.0340                       |            | 52.01               | 0.0199                            |                     |                                   | 48.8                  |

|       |        |        |       |         |       |         |       |
|-------|--------|--------|-------|---------|-------|---------|-------|
| 0.455 | 1.0344 | 1.4081 | 56.2  | 0.0184  | 77.59 | 0.0133  | 47.97 |
| 0.345 | 1.0328 | 1.4127 | 63.9  | 0.0162  | 81.1  | 0.0127  | 46.7  |
| 0.34  | 1.0328 |        | 64.28 | 0.01606 |       |         | 46.5  |
| 0.3   | 1.0322 | 1.4132 | 67.08 | 0.0154  | 82.5  | 0.0125  | 45.89 |
| 0.25  | 1.0315 | 1.4156 | 70.58 | 0.0146  | 83.9  | 0.0123  | 44.53 |
| 0.199 | 1.0307 | 1.4168 | 74.16 | 0.0139  | 84.6  | 0.0122  | 44.8  |
| 0.17  | 1.03   | 1.417  | 76.2  | 0.0135  | 85.3  | 0.0121  | 42.86 |
| 0.1   | 1.0294 | 1.418  | 81.1  | 0.0127  | 86.7  | 0.0118  | 41.4  |
| 0     | 1.028  | 1.4197 | 88.11 | 0.01166 | 88.11 | 0.01166 | 35.96 |

**Table S11.** Physical properties of 2-propanol/water mixtures [215-217] and  $E_T(30)$  values [2,18,19].

| X(water) | density | $M_{av,x}$ | $N_{av,x}$<br>Mol/cm <sup>3</sup> | $M_{av,w}$ | $M_{av,w} / M_{av,x}$ | $E_T(30)$<br>Kcal/mol |
|----------|---------|------------|-----------------------------------|------------|-----------------------|-----------------------|
| 0        | 0.7835  | 60.095     | 0.01304                           | 60.095     | 1                     | 48.3                  |
| 0.05     | 0.788   | 58         | 0.0136                            | 59.17      | 1.02                  | 48.7                  |
| 0.107    | 0.793   | 55.6       | 0.01426                           | 58.04      | 1.044                 | 48.97                 |
| 0.15     | 0.795   | 53.78      | 0.01478                           | 57.98      | 1.078                 | 49.26                 |
| 0.2      | 0.801   | 51.68      | 0.0155                            |            |                       | 49.6                  |
| 0.252    | 0.804   | 49.57      | 0.0162                            |            |                       | 49.97                 |
| 0.3      | 0.812   | 47.44      | 0.017                             | 55.31      | 1.166                 | 50.26                 |
| 0.35     | 0.819   | 45.36      | 0.018                             |            |                       | 50.63                 |
| 0.4      | 0.827   | 43.27      | 0.019                             | 53.09      | 1.227                 | 50.83                 |
| 0.451    | 0.835   | 41.16      | 0.02                              |            |                       | 51.12                 |
| 0.501    | 0.84    | 39.05      | 0.0215                            | 50.4       | 1.29                  | 51.5                  |
| 0.55     | 0.85    | 36.95      | 0.023                             |            | 1.3188                | 51.7                  |
| 0.6      | 0.858   | 34.85      | 0.0246                            | 47.04      | 1.349                 | 52.00                 |
| 0.65     | 0.866   | 32.74      | 0.02645                           |            | 1.377                 | 52.26                 |
| 0.7      | 0.877   | 30.64      | 0.0286                            | 44.55      | 1.3967                | 52.6                  |
| 0.75     | 0.894   | 28.53      | 0.0313                            |            | 1.407                 | 52.9                  |
| 0.8      | 0.9117  | 26.42      | 0.0345                            | 37.15      | 1.406                 | 53.43                 |
| 0.825    | 0.9203  | 25.36      | 0.0363                            |            |                       | 53.75                 |
| 0.85     | 0.9288  | 24.3       | 0.0382                            | 33.6       | 1.383                 | 54.3                  |
| 0.874    | 0.937   | 23.27      | 0.0403                            |            |                       | 54.75                 |
| 0.9      | 0.945   | 22.3       | 0.0424                            | 29.5       | 1.323                 | 55.66                 |
| 0.925    | 0.953   | 21.17      | 0.045                             |            |                       | 57.09                 |
| 0.95     | 0.968   | 20.11      | 0.0481                            | 24.3       | 1.208                 | 59.32                 |
| 0.975    | 0.982   | 19.06      | 0.051                             |            |                       | 61.49                 |
| 1        | 0.997   | 18.015     | 0.0053                            | 18.015     | 1                     | 63.1                  |

**Table 12a.**  $E_T(30)$ , density, various average molar masses and corresponding molar concentrations of 2-methyl-2-propanol/water mixtures, data from [173, 174].  $E_T(30)$  values, data from [19].

| X (water) | Density<br>g/cm <sup>3</sup> | $M_{av,x}$<br>g/mol | $N_{av,x}$<br>mol/cm <sup>3</sup> | $M_{av,w}$<br>g/mol | $M_{av,w} / M_{av,x}$ | $N_{av,w}$<br>mol/cm <sup>3</sup> | $E_T(30)$<br>kcal/mol |
|-----------|------------------------------|---------------------|-----------------------------------|---------------------|-----------------------|-----------------------------------|-----------------------|
| 0         | 0.78                         | 74.12               | 0.0105                            | 74.12               | 1                     | 0.0105                            | 43.8                  |
| 0.05      | 0.783                        | 71.3                | 0.011                             | 73.38               | 1.03                  | 0.0107                            | 44.9                  |
| 0.10      | 0.787                        | 68.5                | 0.0115                            | 72.9                | 1.064                 | 0.0108                            | 45.6                  |
| 0.15      | 0.79                         | 65.7                | 0.012                             | 71.8                | 1.093                 | 0.011                             | 46.3                  |
| 0.20      | 0.794                        | 62.9                | 0.0126                            | 70.91               | 1.127                 | 0.0112                            | 46.86                 |
| 0.25      | 0.795                        | 60.1                | 0.0132                            | 69.9                | 1.163                 | 0.01137                           | 47.4                  |
| 0.30      | 0.802                        | 57.3                | 0.014                             | 68.83               | 1.2                   | 0.01165                           | 47.8                  |
| 0.36      | 0.812                        | 53.9                | 0.015                             | 67.38               | 1.25                  | 0.012                             | 48.2                  |
| 0.40      | 0.825                        | 51.67               | 0.0159                            | 66.3                | 1.283                 | 0.0124                            | 48.8                  |
| 0.45      | 0.826                        | 48.87               | 0.0169                            | 64.52               | 1.32                  | 0.0128                            | 49.2                  |

**Table 12a.**  $E_T(30)$ , density, various average molar masses and corresponding molar concentrations of 2-methyl-2-propanol/water mixtures, data from [173, 174].  $E_T(30)$  values, data from [19].

| X (water) | Density<br>g/cm <sup>3</sup> | $M_{av,x}$<br>g/mol | $N_{av,x}$<br>mol/cm <sup>3</sup> | $M_{av,w}$<br>g/mol | $M_{av,w} / M_{av,x}$ | $N_{av,w}$<br>mol/cm <sup>3</sup> | $E_T(30)$<br>kcal/mol |
|-----------|------------------------------|---------------------|-----------------------------------|---------------------|-----------------------|-----------------------------------|-----------------------|
| 0.50      | 0.833                        | 46.07               | 0.018                             | 63.11               | 1.37                  | 0.0132                            | 49.6                  |
| 0.55      | 0.848                        | 43.3                | 0.02194                           | 60.76               | 1.403                 | 0.014                             | 50.03                 |
| 0.60      | 0.85                         | 40.46               | 0.021                             | 59.14               | 1.462                 | 0.0143                            | 50.4                  |
| 0.65      | 0.857                        | 37.65               | 0.0227                            | 56.67               | 1.505                 | 0.0151                            | 50.8                  |
| 0.70      | 0.872                        | 34.8                | 0.025                             | 53.8                | 1.546                 | 0.0162                            | 51.2                  |
| 0.75      | 0.8734                       | 32.04               | 0.0273                            | 50.44               | 1.574                 | 0.0173                            | 51.6                  |
| 0.80      | 0.898                        | 29.23               | 0.0307                            | 46.46               | 1.59                  | 0.019                             | 52.1                  |
| 0.85      | 0.922                        | 26.43               | 0.0349                            | 41.63               | 1.575                 | 0.022                             | 52.6                  |
| 0.90      | 0.947                        | 23.62               | 0.04                              | 35.63               | 1.508                 | 0.0266                            | 53.7                  |
| 0.925     | 0.958                        | 22.03               | 0.0435                            | 31.7                | 1.439                 | 0.0302                            | 54.6                  |
| 0.95      | 0.97                         | 20.8                | 0.0466                            | 27.93               | 1.32                  | 0.0347                            | 57.3                  |
| 0.975     | 0.983                        | 19.413              | 0.0506                            | 23.36               | 1.2                   | 0.042                             | 60.87                 |
| 1         | 0.997                        | 18.015              | 0.0554                            | 18.015              | 1                     | 0.0554                            | 63.1                  |

**Table S12b.** Refractive index, density, average molar masses, average molar concentrations of 2-methyl-2-propanol/water mixtures, data from [173,174].  $E_T(30)$  values, data from [19].

| $M_{av,v}$<br>g/mol | $N_{av,v}$<br>mol/cm <sup>3</sup> | $n_D^{20}$ | $N_{av,x,CH}$<br>mol/cm <sup>3</sup> | $N_{av,x}$<br>mol/cm <sup>3</sup> | $E_T(30)$<br>kcal/mol |
|---------------------|-----------------------------------|------------|--------------------------------------|-----------------------------------|-----------------------|
| 18.015              | 0.0554                            | 1.332      | 0                                    | 0.0554                            | 63.1                  |
| 28.8                | 0.0345                            | 1.3483     | 0.0114                               | 0.0506                            | 57.3                  |
| 37.3                | 0.025                             | 1.3588     | 0.021                                | 0.0466                            | 53.7                  |
| 43.4                | 0.0213                            | 1.3655     | 0.0294                               | 0.0435                            | 52.6                  |
| 48.44               | 0.0187                            | 1.3698     | 0.036                                | 0.04                              | 52.1                  |
| 52.1                | 0.0169                            | 1.3725     | 0.0471                               | 0.0349                            | 51.6                  |
| 55.18               | 0.0158                            | 1.3744     | 0.0553                               | 0.0307                            | 51.6                  |
| 58                  | 0.0149                            | 1.3759     | 0.0614                               | 0.0273                            | 51.2                  |
| 60.1                | 0.014                             | 1.3771     | 0.0675                               | 0.025                             | 50.8                  |
| 61.98               | 0.0135                            | 1.3782     | 0.0715                               | 0.0227                            | 50.4                  |
| 63.68               | 0.013                             | 1.3792     | 0.0756                               | 0.021                             | 50                    |
| 65.12               | 0.0127                            | 1.38       | 0.0794                               | 0.0196                            | 49.6                  |
| 66.4                | 0.0124                            | 1.3805     | 0.081                                | 0.018                             | 49.2                  |
| 67.6                | 0.012                             | 1.3809     | 0.0856                               | 0.0169                            | 48.8                  |
| 68.56               | 0.0119                            | 1.3813     | 0.0858                               | 0.0159                            | 48.2                  |
| 69.5                | 0.0116                            | 1.3816     | 0.0864                               | 0.015                             |                       |
| 70.42               | 0.0114                            | 1.3818     | 0.0882                               | 0.014                             | 47.8                  |
| 71.15               | 0.0112                            | 1.3819     | 0.0891                               | 0.0132                            | 47.4                  |
| 71.9                | 0.011                             | 1.382      | 0.0907                               | 0.0126                            | 46.8                  |
| 73.3                | 0.0107                            | 1.3821     | 0.0918                               | 0.012                             | 46.3                  |
| 73.1                | 0.0107                            | 1.3821     | 0.09315                              | 0.0115                            | 45.6                  |
| 73.63               | 0.01063                           | 1.382      | 0.094                                | 0.011                             | 44.9                  |
| 74.12               | 0.0105                            | 1.3822     | 0.0945                               | 0.0105                            | 43.8                  |

**Table S13.** Physical data and  $E_T(30)$  values, data from [8], for the 2-Butoxyethanol (BE)/water mixtures at 25°C, physical data from [191].

| X(water) | Density<br>g/cm <sup>3</sup> (293K) | $n_D^{20}$ | $M_{av,x}$<br>g/mol | $N_{av,x}$<br>mol/cm <sup>3</sup> | $N_{av,x,CH}$<br>Mol/cm <sup>3</sup> | $E_T(30)$<br>kcal/mol |
|----------|-------------------------------------|------------|---------------------|-----------------------------------|--------------------------------------|-----------------------|
| 1        | 0.998                               | 1.333      | 18.015              | 0.0554                            | 0                                    | 63.1                  |
| 0.989    | 0.99643                             |            | 19.12               | 0.052                             | 0.00744                              | 59.9                  |
| 0.98     | 0.9949                              |            | 20.018              | 0.0497                            | 0.013                                | 55.04                 |
| 0.97     | 0.9893                              |            | 21.02               | 0.0468                            | 0.018                                | 53.58                 |
| 0.96     | 0.9872                              |            | 22.021              | 0.0448                            | 0.0233                               | 53.24                 |
| 0.95     | 0.984                               |            | 23.022              | 0.04274                           | 0.0278                               | 53.04                 |
| 0.914    | 0.976                               |            | 25.52               | 0.0382                            | 0.0372                               | 53.16                 |
| 0.9      | 0.969                               | 1.3766     | 28.03               | 0.0346                            | 0.045                                | 53.11                 |
| 0.8      | 0.95015                             | 1.394      | 38.04               | 0.0249                            | 0.0647                               |                       |
| 0.7      | 0.9375                              | 1.4036     | 48.06               | 0.0195                            | 0.076                                |                       |
| 0.6      | 0.92776                             | 1.4091     | 58.07               | 0.0159                            | 0.0827                               |                       |
| 0.5      | 0.92                                | 1.4128     | 68.1                | 0.0135                            | 0.08775                              |                       |
| 0.4      | 0.915                               | 1.4153     | 78.1                | 0.0117                            | 0.09126                              |                       |
| 0.3      | 0.9105                              | 1.417      | 88.1                | 0.01033                           | 0.094                                |                       |
| 0.2      | 0.9068                              | 1.4182     | 98.12               | 0.0092                            | 0.0955                               |                       |
| 0.1      | 0.9038                              | 1.4191     | 108.15              | 0.0083                            | 0.09711                              |                       |
| 0        | 0.90118                             | 1.4196     | 118.17              | 0.00762                           | 0.099                                | 50.1                  |
